# Supplementary material
Source: publisher figshare collection journal article supplement (https://acs.figshare.com/ndownloader/files/4317700)
Supplement: Supplementary file 1 [file 4317700]

# Supporting Information

## Superhydrophobic and Ultraviolet-Blocking Cotton Textiles

*Lingling Wang, Xintong Zhang<sup>\*</sup>, Bing Li, Panpan Sun, Jikai Yang, Haiyang Xu, and Yichun Liu<sup>\*</sup>*

Center for Advanced Optoelectronic Functional Materials Research, and Key Laboratory for  
UV-Emitting Materials and Technology of Ministry of Education, Northeast Normal University,  
5268 Renmin Street, Changchun 130024, People's Republic of China

---

<sup>\*</sup> To whom correspondence should be addressed. Tel./Fax: +86-431-85099772; E-mail:  
xtzhang@nenu.edu.cn (X.Z.) and ycliu@nenu.edu.cn (Y.L.)

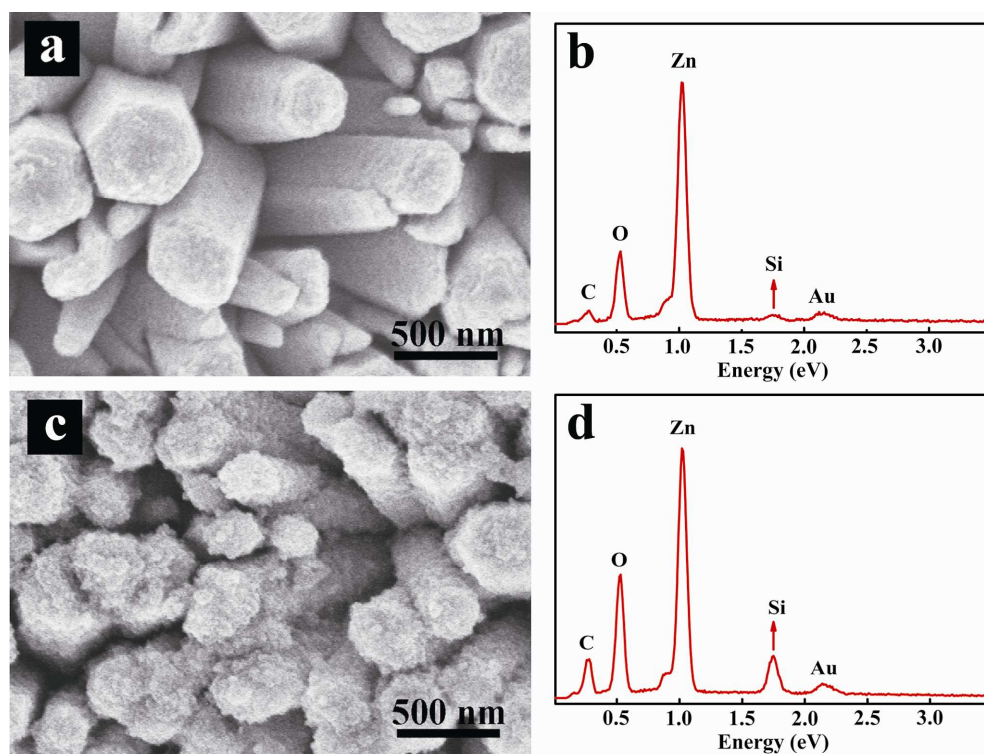

**Figure S1.** Typical SEM images and EDX spectra of ZnO@SiO<sub>2</sub> nanorod array upon LbL deposition of SiO<sub>2</sub> shell for different deposition cycles: (a, b) 1 time and (c, d) 3 times. As the increasing of LbL deposition cycles, the surface of nanorods became rougher. The amount of SiO<sub>2</sub> nanoparticles which coated on the surface of ZnO nanorod increased obviously.

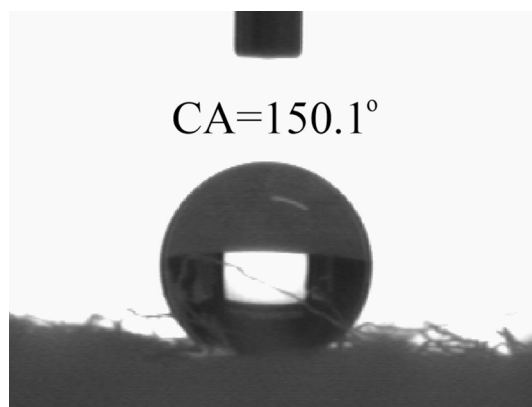

**Figure S2.** The photograph of a water droplet placed on the surface of OTS-modified ZnO@SiO<sub>2</sub> nanorod array coated cotton textile after 24 h laundering treatment which was carried out in a water-filled beaker under continuous strong stirring. The laundering didn't affect its superhydrophobicity, the CA value of sample is still beyond 150° which presents well washing durability.
